# Supplementary material
Source: HighWire-hosted journal article supplement (https://erj.ersjournals.com/content/60/4/2102276)
Supplement: inline-supplementary-material-1 [file inline-supplementary-material-1.pdf]

## The paradox of pulmonary arterial hypertension in Italy in the COVID-19 era: why less could be more

Roberto Badagliacca, MD, PhD <sup>a</sup>, Silvia Papa, MD <sup>a</sup>, Michele D'Alto <sup>b</sup>, Stefano Ghio, MD <sup>c</sup>, Piergiuseppe Agostoni, MD <sup>d</sup>, Pietro Ameri, MD <sup>e</sup>, Paola Argiento, MD <sup>b</sup>, Natale Daniele Brunetti, MD <sup>e</sup>, Vito Casamassima, MD <sup>f</sup>, Gavino Casu, MD, PhD <sup>g</sup>, Nadia Cedrone, RN, MSN <sup>h</sup>, Marco Confalonieri, MD <sup>i</sup>, Marco Corda, MD <sup>l</sup>, Michele Correale, MD <sup>m</sup>, Carlo D'Agostino, MD <sup>n</sup>, Lucrezia De Michele, MD <sup>n</sup>, Giulia Famoso, MD <sup>o</sup>, Giuseppe Galgano, MD <sup>g</sup>, Alessandra Greco, MD <sup>c</sup>, Carlo Mario Lombardi, MD <sup>p</sup>, Giovanna Manzi, MD <sup>a</sup>, Rosalinda Madonna, MD <sup>q</sup>, Valentina Mercurio, MD <sup>r</sup>, Massimiliano Mulè, MD <sup>s</sup>, Giuseppe Paciocco, MD <sup>t</sup>, Antonella Romaniello, MD <sup>u</sup>, Emanuele Romeo, MD, PhD <sup>b</sup>, Laura Scelsi, MD <sup>c</sup>, Walter Serra, MD <sup>v</sup>, Davide Stolfo, MD <sup>w</sup>, Matteo Toma, MD <sup>x</sup>, Marco Vatrano, MD <sup>y</sup>, Patrizio Vitulo, MD <sup>z</sup>, Carmine Dario Vizza, MD <sup>a</sup>.  
The Italian Pulmonary Hypertension Network (iPHNET).

### The Italian Pulmonary Hypertension Network (iPHNET) group:

- 1- Dott. **Carlo Albera**, SC Pneumologia U Ospedale Molinette Corso Bramante 88/90 – 101226 Torino, [carlo.albera@yahoo.it](mailto:carlo.albera@yahoo.it)
- 2- Dott. **Davide Barbisan**, Azienda Sanitaria Universitaria Integrata of Trieste (ASUITS), University of Trieste Cardiovascular Department - Cattinara Hospital, [barbisand@gmail.com](mailto:barbisand@gmail.com)
- 3- Dott. **Vincenzo Bellomo**, Ecclesiastical Entity General Regional Hospital Francesco Miulli, 161123, Department of cardiology, Acquaviva delle Fonti, Italy, [enzobellomo@libero.it](mailto:enzobellomo@libero.it)
- 4- Dott.ssa **Marta Beretta**, Pulmonology Unit, IRCCS - Istituto Mediterraneo Trapianti e Terapie ad Alta Specializzazione (ISMETT), Palermo, Italy, [mberetta@ismett.edu](mailto:mberetta@ismett.edu)
- 5- Dott. **Marco Biolo**, Pulmonology Unit, Heart-Thorax-Vessels Dept., University Hospital of Cattinara, Trieste, Italy, [marco.biolo@asugi.sanita.fvg.it](mailto:marco.biolo@asugi.sanita.fvg.it)
- 6- Dott. **Federico Biondi**, Cardiovascular Department, Azienda Sanitaria Universitaria Giuliano Isontina, Trieste, Italy, [biondi.federico@yahoo.it](mailto:biondi.federico@yahoo.it)
- 7- Dott. **Andrea Bonelli**, Department of Medical and Surgical Specialties, Radiological Sciences, and Public Health, University and Civil Hospital (Brescia, Italy), [bonelliandrea01@gmail.com](mailto:bonelliandrea01@gmail.com)
- 8- Dott. **Renato Carignola**, SCU Malattie dell'Apparato Respiratorio 2 AOU San Luigi Gonzaga Regione Gonzole, 10 – 10043 Orbassano (Torino), [renatocarigno@gmail.com](mailto:renatocarigno@gmail.com)
- 9- Dott. **Francesco Cassadonte**, Cardiology Unit, Hospital “Pugliese-Ciaccio” of Catanzaro, Italy, [fcassadonte@aocatanzaro.it](mailto:fcassadonte@aocatanzaro.it)
- 10- Dott.ssa **Maria Alberta Cattabiani**, UO Cardiologia AOU di Parma – Ospedale maggiore di Parma, [macattabiani@ao.pr.it](mailto:macattabiani@ao.pr.it)
- 11- Dott. **Vincenzo Antonio Ciconte**, Cardiology Unit, Hospital “Pugliese-Ciaccio” of Catanzaro, Italy, [enzocico2003@yahoo.it](mailto:enzocico2003@yahoo.it)
- 12- Dott.ssa **Paola Confalonieri**, Pulmonology Unit, Heart-Thorax-Vessels Dept., University

- Hospital of Cattinara, Trieste, Italy, [paola.confalonieri@studenti.units.it](mailto:paola.confalonieri@studenti.units.it)
- 13- Dott.ssa **Chiara Cresci**, SO Pneumologia e Fisiopatologia Toraco-Polmonare AOU Careggi Largo brambilla, 3 – 50134 Firenze, [ccresci65@gmail.com](mailto:ccresci65@gmail.com)
  - 14- Dott.ssa **Alessandra Cuomo**, Department of Translational Medical Sciences - Federico II University of Naples, Italy, [alebcuomo@gmail.com](mailto:alebcuomo@gmail.com)
  - 15- Dott.ssa **Raffaele De Caterina**, UOC Cardiologia 1 AOU Piasana Via Roma, 67 – 56126 Pisa, [rdecaterina@unich.it](mailto:rdecaterina@unich.it)
  - 16- Dott.ssa **Elisabetta De Tommasi**, Cardiology Department – University Hospital Policlinico Consorziale Bari, Italy, [edetommasi@libero.it](mailto:edetommasi@libero.it)
  - 17- Dott. **Gabriele Di Gesaro**, Pulmonology Unit, IRCCS - Istituto Mediterraneo Trapianti e Terapie ad Alta Specializzazione (ISMETT), Palermo, Italy, [gdigesaro@ismett.edu](mailto:gdigesaro@ismett.edu)
  - 18- Dott.ssa **Stefania Farina**, UO Scompenso, Cardiologia Clinica e Cardiologia Riabilitativa Centro cardiologico Monzino IRCCS Via Carlo Parea, 4 – 20138 Milano, [stefania.farina@cardiologicomonzino.it](mailto:stefania.farina@cardiologicomonzino.it)
  - 19- Dott. **Francesco Fedele**, Dept. of Cardiovascular and Respiratory Sciences - Sapienza University of Rome, Italy, [francesco.fedele@uniroma1.it](mailto:francesco.fedele@uniroma1.it)
  - 20- Dott. **Martino Fortunato**, Cardiology Department, Ospedali Riuniti University Hospital, Foggia, Italy [dottor.martinofortunato@gmail.com](mailto:dottor.martinofortunato@gmail.com)
  - 21- Dott.ssa **Giulia Gagno**, Azienda Sanitaria Universitaria Integrata of Trieste (ASUITS), University of Trieste Cardiovascular Department - Cattinara Hospital, [gagnogiulia@gmail.com](mailto:gagnogiulia@gmail.com)
  - 22- Dott. **Pietro Geri**, Pulmonology Unit, Heart-Thorax-Vessels Dept., University Hospital of Cattinara, Trieste, Italy, [pietro.geri@asugi.sanita.fvg.it](mailto:pietro.geri@asugi.sanita.fvg.it)
  - 23- Dott. **Daniele Ghiraldin**, Department of Medical and Surgical Specialties, Radiological Sciences, and Public Health, University and Civil Hospital (Brescia, Italy), [daniele.ghiraldin@gmail.com](mailto:daniele.ghiraldin@gmail.com)
  - 24- Dott.ssa **Daniela Giannazzo**, Dipartimento Cardio-Toraco-Vascolare AOU Policlinico Vittorio Emanuele Presidio Ferrarotto Via Salvatore Citelli, 31 – 95100 Catania, [danielagiannazzo@libero.it](mailto:danielagiannazzo@libero.it)
  - 25- Dott. **Giorgio Giardina**, Cardiology Unit, Azienda Ospedaliera "G. Brotzu" San Michele, Cagliari, Italy, [giorgiogiardina@aob.it](mailto:giorgiogiardina@aob.it)
  - 26- Dott. **Paolo Golino**, Cardiologia Università L. Vanvitelli, Napoli, [paolo.golino@unicampania.it](mailto:paolo.golino@unicampania.it)
  - 27- Dott.ssa **Maria Chiara Grimaldi**, Cardiology Unit, S. Andrea Hospital, Rome, Italy. [mariachiara.grimaldi@gmail.com](mailto:mariachiara.grimaldi@gmail.com)
  - 28- Dott. **Ludovico Lanfranchi**, Dipartimento Cardio-Toraco-Vascolare – Clinica Pneumologica AO San Gerardo, Monza, Italy, [l.lanfranchi3@campus.unimib.it](mailto:l.lanfranchi3@campus.unimib.it)
  - 29- Dott.ssa **Mariangela Lattanzio**, Cardiologia Ospedale di Circolo e Fondazione Macchi Viale Luigi Borri, 57 – 21100 Varese, [marylat@libero.it](mailto:marylat@libero.it)
  - 30- Dott. **Claudio Lunardi**, Clinical Immunology and Allergology, Department of Medicine, University of Verona – I, [claudio.lunardi@univr.it](mailto:claudio.lunardi@univr.it)
  - 31- Dott. **Federico Luongo**, Dept. of Cardiovascular and Respiratory Sciences - Sapienza University of Rome, Italy, [federico.luongo91@gmail.com](mailto:federico.luongo91@gmail.com)
  - 32- Dott.ssa **Antonella Mannarini**, Cardiology Department – University Hospital Policlinico Consorziale Bari, Italy

- 33- Dott.ssa **Lavinia Martino**, Pulmonology Unit, IRCCS - Istituto Mediterraneo Trapianti e Terapie ad Alta Specializzazione (ISMETT), Palermo, Italy, [lmartino@ismett.edu](mailto:lmartino@ismett.edu)
- 34- Dott. **Pierluigi Merella**, ATS Sardegna-ASSL Nuoro, San Francesco Hospital Nuoro, Italy, [pierluigi9@hotmail.it](mailto:pierluigi9@hotmail.it)
- 35- Dott. **Cristiano Miotti**, Dept. of Cardiovascular and Respiratory Sciences - Sapienza University of Rome, Italy, [miotticristiano@gmail.com](mailto:miotticristiano@gmail.com)
- 36- Dott.ssa **Beatrice Pezzuto**, UO Scompenso, Cardiologia Clinica e Cardiologia Riabilitativa Centro cardiologico Monzino IRCCS Via Carlo Parea, 4 – 20138 Milano, [beatrice.pezzuto@gmail.com](mailto:beatrice.pezzuto@gmail.com)
- 37- Dott.ssa **Cristina Piccinino**, Cardiologia 1 AOU Maggiore della carità di Novara Corso Mazzini, 18 – 28100 Novara, [cristina.piccinino@virgilio.it](mailto:cristina.piccinino@virgilio.it)
- 38- Dott.ssa **Francesca Rampini**, Dept. of Cardiovascular and Respiratory Sciences - Sapienza University of Rome, Italy, [francy.rampini@gmail.com](mailto:francy.rampini@gmail.com)
- 39- Dott.ssa **Imma Romanazzi** Dipartimento Cardio-Toraco-Vascolare AOU Policlinico Vittorio Emanuele –Presidio Ferrarotto, Catania Italy
- 40- Dott.ssa **Susanna Sciomer**, Dept. of Cardiovascular and Respiratory Sciences - Sapienza University of Rome, Italy, [susanna.sciomer@uniroma1.it](mailto:susanna.sciomer@uniroma1.it)
- 41- Dott. **Gianmarco Scoccia**, Dept. of Cardiovascular and Respiratory Sciences - Sapienza University of Rome, Italy, [gianmarcoscoccia@gmail.com](mailto:gianmarcoscoccia@gmail.com)
- 42- Dott. **Piermario Scuri**, Unità di Cardiologia Ospedale Papa Giovanni XXIII Centro Ospedaliero – 24129 Bergamo, [pscuri@asst-pg23.it](mailto:pscuri@asst-pg23.it)
- 43- Dott. **Gianfranco Sinagra**, Direttore Dipartimento Cardiovascolare Azienda Ospedaliero- Universitaria “Ospedali Riuniti” Trieste, [gianfranco.sinagra@aots.sanita.fvg.it](mailto:gianfranco.sinagra@aots.sanita.fvg.it)
- 44- Dott. **Corrado Tamburino** Dipartimento Cardio-Toraco-Vascolare AOU Policlinico Vittorio Emanuele –Presidio Ferrarotto, Catania Italy [tambucor@unict.it](mailto:tambucor@unict.it)
- 45- Dott.ssa **Lucia Tricarico**, Cardiology Department, Ospedali Riuniti University Hospital, Foggia, Italy, [lucia.tricarico.it@gmail.com](mailto:lucia.tricarico.it@gmail.com)
- 46- Dott.ssa **Sara Uras**, ATS Sardegna-ASSL Nuoro, San Francesco Hospital Nuoro, Italy, [sara.uras@atssardegna.it](mailto:sara.uras@atssardegna.it)

### **The IPHNET Group**

|                 |
|-----------------|
| C. Albera       |
| D. Barbisan     |
| V. Bellomo      |
| M. Beretta      |
| M. Biolo        |
| F. Biondi       |
| A. Bonelli      |
| R. Carignola    |
| F. Cassadonte   |
| M.A. Cattabiani |
| V.A. Ciconte    |
| P. Confalonieri |
| C. Cresci       |
| A. Cuomo        |
| R. De Caterina  |
| E. De Tommasi   |
| G. Di Gesaro    |
| S. Farina       |
| F. Fedele       |
| M. Fortunato    |
| G. Gagno        |
| P. Geri         |
| D. Ghiraldin    |
| D. Giannazzo    |
| G. Giardina     |
| P. Golino       |
| M.C. Grimaldi   |
| L. Lanfranchi   |
| M. Lattanzio    |
| C. Lunardi      |
| F. Luongo       |
| A. Mannarini    |
| L. Martino      |
| P. Merella      |
| C. Miotti       |
| B. Pezzuto      |
| C. Piccinino    |
| F. Rampini      |
| I. Romanazzi    |
| S. Sciomer      |
| G. Scoccia      |
| P. Scuri        |
| G. Sinagra      |
| C. Tamburino    |
| L. Tricarico    |
| S. Uras         |
